# Supplementary material
Source: PubMed Central journal article supplement (PMC4361689)
Supplement: NIHMS36419-supplement-01.pdf [file NIHMS36419-supplement-01.pdf]

## Supplementary Material

### Differentiation of metallicolous and non-metallicolous *Salix caprea* populations based on phenotypic characteristics and nuclear microsatellite (SSR) markers

Markus Puschenreiter<sup>1\*</sup>, Mine Türктаş<sup>2\*</sup>, Peter Sommer<sup>1</sup>, Gerlinde Wieshammer<sup>1</sup>, Gregor Laaha<sup>3</sup>, Walter W. Wenzel<sup>1</sup> and Marie-Theres Hauser<sup>2</sup>

**Supplementary Table 1:** Summary of the soil characteristics for each isolate and their growth and accumulation behaviour in perlite-based soil-less cultures exposed to elevated levels of Cd (0.5 mg L<sup>-1</sup>) and Zn (5 mg L<sup>-1</sup>).

| Soil sample       | Zn total<br>mg/kg | Cd total<br>mg/kg | pH   | Zn<br>labile<br>mg/kg | Cd<br>labile<br>mg/kg | Plant<br>sample<br>Perlite | Zn Perlite |      | Cd Perlite |       | Biomass |      |
|-------------------|-------------------|-------------------|------|-----------------------|-----------------------|----------------------------|------------|------|------------|-------|---------|------|
|                   |                   |                   |      |                       |                       |                            | mean       | SE   | mean       | SE    | mean    | SE   |
| <b>Prag</b>       |                   |                   |      |                       |                       | Nr                         |            |      |            |       |         |      |
| P1-5, 21-22 S     | 87.4              | 0.41              | 5.83 | 0.85                  | 0.016                 | 1                          | 888        | 87.2 | 119        | 16.93 | 3.52    | 0.23 |
| P1-5, 21-22 S     | 87.4              | 0.41              | 5.83 | 0.85                  | 0.016                 | 2                          | 787        | 22.5 | 82.0       | 3.77  | 5.20    | 0.25 |
| P1-5, 21-22 S     | 87.4              | 0.41              | 5.83 | 0.85                  | 0.016                 | 3                          | 773        | 17.8 | 68.8       | 6.39  | 4.10    | 0.44 |
| P1-5, 21-22 S     | 87.4              | 0.41              | 5.83 | 0.85                  | 0.016                 | 4                          | 874        | 32.2 | 97.8       | 7.34  | 2.44    | 0.54 |
| P1-5, 21-22 S     | 87.4              | 0.41              | 5.83 | 0.85                  | 0.016                 | 5                          | 797        | 37.9 | 121        | 22.4  | 3.10    | 0.90 |
| P6 S              | 67.9              | 0.26              | 6.06 | 0.37                  | 0.008                 | 6                          | 638        | 10.0 | 72.6       | 2.57  | 2.99    | 0.44 |
| P7-8 S a          | 72.0              | 0.28              | 7.62 | 0.12                  | 0.008                 | 7                          | 600        | 10.1 | 58.5       | 4.08  | 5.04    | 0.24 |
| P7-8 S b          | 72.0              | 0.28              | 7.62 | 0.12                  | 0.005                 | 8                          | 577        | 8.8  | 46.5       | 1.76  | 5.29    | 1.15 |
| P9 S              | 67.5              | 0.29              | 6.57 | 0.20                  | 0.006                 | 9                          | 680        | 35.1 | 68.0       | 5.28  | 2.24    | 0.43 |
| P10-11 S          | 67.5              | 0.26              | 6.48 | 0.17                  | 0.005                 | 10                         | 1187       | 206  | 147        | 35.0  | 0.89    | 0.48 |
| P10-11 S          | 67.5              | 0.26              | 6.48 | 0.17                  | 0.005                 | 11                         | 922        | 51.3 | 91.6       | 1.54  | 6.06    | 0.40 |
| P12-13 - S        | 59.9              | 0.19              | 5.43 | 0.65                  | 0.016                 | 12                         | 799        | 65.8 | 90.8       | 9.42  | 4.20    | 1.10 |
| P12-13 - S        | 59.9              | 0.19              | 5.43 | 0.65                  | 0.016                 | 13                         | 777        | 41.0 | 85.3       | 7.11  | 5.78    | 1.02 |
| P14-16+18S        | 64.6              | 0.22              | 5.43 | 0.80                  | 0.019                 | 14                         | 678        | 21.6 | 71.5       | 7.22  | 4.35    | 0.51 |
| P14-16+18S        | 64.6              | 0.22              | 5.43 | 0.80                  | 0.019                 | 15                         | 835        | 94.5 | 94.0       | 13.9  | 4.22    | 0.34 |
| P14-16+18S        | 64.6              | 0.22              | 5.43 | 0.80                  | 0.019                 | 16                         | 913        | 44.0 | 141        | 31.1  | 2.53    | 0.53 |
| P17 S             | 60.3              | 0.19              | 5.37 | 0.73                  | 0.019                 | 17                         | 634        | 16.4 | 61.4       | 1.73  | 4.75    | 0.35 |
| P14-16+18S        | 64.6              | 0.22              | 5.43 | 0.80                  | 0.019                 | 18                         | 644        | 58.0 | 86.4       | 17.3  | 3.22    | 0.57 |
| P1-5, 21-22 S     | 87.4              | 0.41              | 5.83 | 0.85                  | 0.016                 | 21                         | 752        | 67.7 | 96.6       | 12.8  | 4.22    | 1.20 |
| P1-5, 21-22 S     | 87.4              | 0.41              | 5.83 | 0.85                  | 0.016                 | 22                         | 815        | 59.4 | 111        | 10.9  | 3.46    | 0.30 |
| <b>Mezica</b>     |                   |                   |      |                       |                       |                            |            |      |            |       |         |      |
| S - M1-3, 21-25   | 1292              | 18.1              | 7.2  | 0.92                  | 0.10                  | 1                          | 820        | 19.6 | 119        | 15.4  | 3.24    | 0.28 |
| S - M1-3, 21-25   | 1292              | 18.1              | 7.2  | 0.92                  | 0.10                  | 3                          | 736        | 23.8 | 122        | 24.7  | 3.61    | 0.49 |
| S - M5            | 9534              | 59.4              | 7.2  | 29.4                  | 0.63                  | 4                          | 845        | 216  | 146        | 55.6  | 3.36    | 1.02 |
| S - M7            | 404               | 7.65              | 7.27 | 0.70                  | 0.07                  | 7                          | 608        | 39.6 | 86.4       | 2.9   | 5.35    | 0.21 |
| S - M9+10+11      | 2747              | 13.6              | 7.57 | 2.35                  | 0.04                  | 10                         | 784        | 114  | 90.0       | 3.1   | 3.07    | 0.85 |
| S - M9+10+11      | 2747              | 13.6              | 7.57 | 2.35                  | 0.04                  | 11                         | 1476       | 235  | 243        | 50.5  | 1.67    | 0.52 |
| S - M8, 12-14, 26 | 1508              | 15.3              | 6.94 | 1.33                  | 0.07                  | 13                         | 570        | 23.3 | 76.0       | 3.9   | 4.63    | 0.31 |
| S - M15           | 3269              | 28.5              | 7.06 | 7.75                  | 0.18                  | 15                         | 882        | 52.8 | 145        | 11.2  | 2.61    | 0.35 |
| S - M16           | 489               | 9.94              | 7.19 | 1.05                  | 0.06                  | 16                         | 679        | 35.7 | 112        | 9.0   | 2.63    | 0.35 |
| S - M17           | 131               | 1.93              | 7.45 | 0.40                  | 0.02                  | 17                         | 541        | 19.5 | 65.4       | 3.0   | 2.69    | 0.12 |
| S - M18           | 2267              | 35.3              | 6.64 | 6.99                  | 0.20                  | 18                         | 686        | 178  | 86.7       | 38.1  | 1.74    | 1.49 |
| S - M19+20        | 1867              | 18.3              | 7.28 | 3.60                  | 0.10                  | 19                         | 719        | 119  | 133        | 30.2  | 2.78    | 0.40 |

|                      |      |      |      |      |       |    |      |      |      |      |      |      |
|----------------------|------|------|------|------|-------|----|------|------|------|------|------|------|
| S - M19+20           | 1867 | 18.3 | 7.28 | 3.60 | 0.10  | 20 | 991  | 50.8 | 116  | 19.3 | 1.16 | 0.35 |
| S - M1-3, 21-25      | 1292 | 18.1 | 7.2  | 0.92 | 0.10  | 21 | 1656 | 178  | 265  | 25.3 | 1.64 | 0.28 |
| S - M1-3, 21-25      | 1292 | 18.1 | 7.2  | 0.92 | 0.10  | 22 | 893  | 47.4 | 112  | 9.0  | 4.13 | 0.32 |
| S - M1-3, 21-25      | 1292 | 18.1 | 7.2  | 0.92 | 0.10  | 23 | 995  | 149  | 156  | 26.0 | 2.68 | 0.56 |
| S - M1-3, 21-25      | 1292 | 18.1 | 7.2  | 0.92 | 0.10  | 24 | 1228 | 51.4 | 207  | 16.3 | 1.55 | 0.17 |
| S - M1-3, 21-25      | 1292 | 18.1 | 7.2  | 0.92 | 0.10  | 25 | 1103 | 120  | 152  | 12.1 | 2.60 | 0.66 |
| S - M8, 12-14, 26    | 1508 | 15.3 | 6.94 | 1.33 | 0.07  | 26 | 959  | 64.3 | 140  | 9.4  | 2.89 | 0.29 |
| S - M18, 27          | 2267 | 35.3 | 6.64 | 6.99 | 0.20  | 27 | 1154 | 212  | 138  | 9.2  | 1.87 | 0.82 |
|                      |      |      |      |      |       | 28 | 781  | 38.9 | 104  | 11.6 | 2.56 | 0.23 |
| <b>Pribram</b>       |      |      |      |      |       |    |      |      |      |      |      |      |
| PR1 S                | 276  | 7.35 | 4.88 | 25.7 | 1.68  | 1  | 765  | 46.7 | 182  | 29.1 | 1.01 | 0.08 |
| PR 2-6               | 202  | 4.70 | 5.5  | 13.1 | 1.22  | 2  | 743  | 28.4 | 90.8 | 6.51 | 1.74 | 0.26 |
| PR 2-6               | 202  | 4.70 | 5.5  | 13.1 | 1.22  | 3  | 751  | 45.1 | 85.4 | 6.35 | 2.91 | 0.32 |
| PR 2-6               | 202  | 4.70 | 5.5  | 13.1 | 1.22  | 4  | 929  | 63.8 | 111  | 16.8 | 1.74 | 0.65 |
| PR 2-6               | 202  | 4.70 | 5.5  | 13.1 | 1.22  | 5  | 722  | 64.4 | 65.3 | 21.6 | 2.80 | 0.55 |
| PR 2-6               | 202  | 4.70 | 5.5  | 13.1 | 1.22  | 6  | 614  | 33.4 | 52.9 | 2.88 | 3.21 | 0.28 |
| PR7-9 S              | 4182 | 35.8 | 6.35 | 36.5 | 1.01  | 7  | 936  | 26.6 | 137  | 0.56 | 1.40 | 0.35 |
| PR7-9 S              | 4182 | 35.8 | 6.35 | 36.5 | 1.01  | 8  | 648  | 47.7 | 67.7 | 10.8 | 3.59 | 0.47 |
| PR7-9 S              | 4182 | 35.8 | 6.35 | 36.5 | 1.01  | 9  | 670  | 38.7 | 84.1 | 10.5 | 2.50 | 0.25 |
| PR10-12 S a          | 4387 | 38.9 | 6.5  | 63.3 | 1.40  | 10 | 928  | 20.9 | 76.5 | 8.26 | 1.55 | 0.18 |
| PR10-12 S a          | 4387 | 38.9 | 6.5  | 63.3 | 1.40  | 11 | 807  | 63.0 | 141  | 9.29 | 1.25 | 0.18 |
| PR13 S               | 1139 | 10.3 | 7.35 | 2.01 | 0.13  | 13 | 715  | 55.5 | 65.2 | 8.44 | 2.74 | 0.33 |
| PR14-17 S            | 2091 | 12.6 | 7.25 | 1.20 | 0.11  | 14 | 838  | 90.8 | 134  | 52.6 | 1.65 | 0.52 |
| PR14-17 S            | 2091 | 12.6 | 7.25 | 1.20 | 0.11  | 15 | 859  | 57.3 | 87.6 | 3.84 | 2.00 | 0.12 |
| PR14-17 S            | 2091 | 12.6 | 7.25 | 1.20 | 0.11  | 16 | 624  | 47.2 | 67.4 | 6.97 | 2.78 | 0.16 |
| PR18-19 S            | 2962 | 30.0 | 5.95 | 221  | 4.69  | 18 | 879  | 67.8 | 129  | 14.8 | 1.98 | 0.11 |
| PR18-19 S            | 2962 | 30.0 | 5.95 | 221  | 4.69  | 19 | 774  | 75.9 | 86.9 | 12.2 | 1.78 | 0.09 |
| <b>Arnoldstein</b>   |      |      |      |      |       |    |      |      |      |      |      |      |
| A1-3, A21-S          | 2492 | 19.4 | 7.3  | 14.3 | 0.11  | 1  | 913  | 27.0 | 148  | 13.8 | 1.85 | 0.24 |
| A5, A22-S            | 1530 | 11.9 | 6.23 | 57.4 | 0.90  | 5  | 701  | 22.5 | 118  | 8.61 | 3.00 | 0.38 |
| A 6 - 8-S            | 1244 | 9.65 | 6.61 | 8.68 | 0.21  | 6  | 685  | 44.2 | 88.6 | 12.1 | 5.09 | 0.40 |
| A 6 - 8-S            | 1244 | 9.65 | 6.61 | 8.68 | 0.21  | 8  | 709  | 68.7 | 138  | 25.7 | 2.13 | 0.40 |
| A9-S                 | 4465 | 13.5 | 7.89 | 35.1 | 0.17  | 9  | 590  | 45.9 | 79.0 | 7.97 | 3.84 | 0.22 |
| A10-16-S             | 1824 | 3.91 | 7.97 | 7.57 | 0.03  | 13 | 604  | 67.4 | 100  | 8.38 | 3.51 | 0.30 |
| A10-16-S             | 1824 | 3.91 | 7.97 | 7.57 | 0.03  | 11 | 545  | 23.8 | 78.6 | 1.64 | 3.37 | 0.09 |
| A10-16-S             | 1824 | 3.91 | 7.97 | 7.57 | 0.03  | 14 | 733  | 68.0 | 117  | 15.6 | 3.20 | 0.42 |
| A10-16-S             | 1824 | 3.91 | 7.97 | 7.57 | 0.03  | 15 | 900  | 85.9 | 192  | 25.0 | 2.34 | 0.37 |
| A17-S                | 1011 | 3.93 | 7.59 | 0.82 | 0.02  | 16 | 784  | 25.0 | 129  | 3.55 | 2.87 | 0.61 |
| A18-S                | 1898 | 12.0 | 7.44 | 10.0 | 0.15  | 19 | 903  | 130  | 153  | 30.5 | 2.82 | 0.51 |
| A19,20-S             | 1134 | 6.50 | 7.49 | 2.83 | 0.10  | 20 | 516  | 57.0 | 65.3 | 16.8 | 4.56 | 0.89 |
| A1-3, A21-S          | 2492 | 19.4 | 7.3  | 14.3 | 0.11  | 21 | 855  | 100  | 127  | 20.0 | 1.85 | 0.70 |
| A5, A22-S            | 1530 | 11.9 | 6.23 | 57.4 | 0.90  | 22 | 1062 | 90.2 | 169  | 27.1 | 3.13 | 0.63 |
| A19,20-S=A23         | 1134 | 6.50 | 7.49 | 2.83 | 0.10  | 23 | 751  | 36.5 | 122  | 7.68 | 2.47 | 0.09 |
| A1-3, 21, 24 S       | 2492 | 19.4 | 7.3  | 14.3 | 0.11  | 24 | 1192 | 57.0 | 248  | 15.1 | 1.52 | 0.10 |
| A18-S=A27            | 1898 | 12.0 | 7.44 | 10.0 | 0.15  | 27 | 1173 | 28.0 | 192  | 28.1 | 2.17 | 0.31 |
| A9-S=A28             | 4465 | 13.5 | 7.89 | 35.1 | 0.17  | 28 | 910  | 108  | 179  | 23.6 | 1.16 | 0.18 |
| <b>Forchtenstein</b> |      |      |      |      |       |    |      |      |      |      |      |      |
| F2-4S                | 80.9 | 0.46 | 5.83 | 5.94 | 0.052 | 2  | 691  | 79.6 | 126  | 19.5 | 2.24 | 0.53 |
| F2-4S                | 80.9 | 0.46 | 5.83 | 5.94 | 0.052 | 3  | 606  | 32.4 | 72.1 | 3.13 | 3.23 | 0.31 |
| F5-9S                | 92.8 | 0.37 | 4.74 | 3.50 | 0.032 | 6  | 681  | 65.7 | 83.1 | 12.7 | 4.10 | 0.56 |
| F5-9S                | 92.8 | 0.37 | 4.74 | 3.50 | 0.032 | 7  | 570  | 21.7 | 60.1 | 4.28 | 4.40 | 0.19 |
| F5-9S                | 92.8 | 0.37 | 4.74 | 3.50 | 0.032 | 8  | 917  | 98.3 | 114  | 19.1 | 4.04 | 0.80 |
| F10-18S              | 89.0 | 0.59 | 4.3  | 8.03 | 0.049 | 10 | 804  | 47.4 | 96.6 | 16.6 | 2.90 | 0.52 |

|                    |      |       |      |       |       |    |      |      |      |      |      |      |
|--------------------|------|-------|------|-------|-------|----|------|------|------|------|------|------|
| F10-18S            | 89.0 | 0.59  | 4.3  | 8.03  | 0.049 | 11 | 897  | 70.3 | 118  | 9.48 | 3.29 | 0.62 |
| F10-18S            | 89.0 | 0.59  | 4.3  | 8.03  | 0.049 | 12 | 707  | 58.0 | 79.3 | 13.9 | 3.68 | 0.35 |
| F10-18S            | 89.0 | 0.59  | 4.3  | 8.03  | 0.049 | 13 | 659  | 26.2 | 93.4 | 3.32 | 3.45 | 0.23 |
| F10-18S            | 89.0 | 0.59  | 4.3  | 8.03  | 0.049 | 14 | 797  | 110  | 125  | 26.4 | 2.75 | 0.41 |
| F10-18S            | 89.0 | 0.59  | 4.3  | 8.03  | 0.049 | 17 | 633  | 11.5 | 85.1 | 2.85 | 3.74 | 0.49 |
| F19-S              | 519* | 0.50  | 5.14 | 76.45 | 0.028 | 19 | 632  | 37.5 | 61.8 | 4.76 | 3.20 | 0.29 |
| F20-S              | 228* | 0.79  | 7.47 | 0.15  | 0.003 | 20 | 575  | 48.4 | 57.5 | 9.65 | 4.37 | 1.00 |
| <b>Kutna Hora</b>  |      |       |      |       |       |    |      |      |      |      |      |      |
| KH1-2 S            | 8603 | 72.00 | 6.42 | 82.99 | 1.206 | 1  | 924  | 29.2 | 133  | 9.55 | 1.74 | 0.38 |
| KH1-2 S            | 8603 | 72.00 | 6.42 | 82.99 | 1.206 | 2  | 745  | 74.1 | 76.2 | 6.96 | 2.40 | 0.34 |
| KH3-5, 21 S        | 2740 | 31.50 | 7.91 | 5.36  | 0.124 | 4  | 741  | 54.3 | 104  | 15.0 | 2.57 | 0.56 |
| KH3-5, 21 S        | 2740 | 31.50 | 7.91 | 5.36  | 0.124 | 5  | 650  | 19.9 | 61.0 | 4.88 | 2.37 | 0.49 |
| KH6 S              | 8220 | 84.00 | 7.14 | 14.65 | 0.378 | 6  | 862  | 61.5 | 110  | 17.0 | 1.66 | 0.36 |
| KH7 S              | 630  | 4.00  | 7.58 | 1.94  | 0.024 | 7  | 921  | 59.9 | 117  | 11.3 | 2.34 | 0.25 |
| KH8 S              | 5015 | 54.00 | 7.19 | 9.36  | 0.364 | 8  | 667  | 27.6 | 82.2 | 2.92 | 1.79 | 0.15 |
| KH10, 22 S         | 4814 | 61.00 | 7.02 | 18.52 | 0.673 | 10 | 618  | 33.1 | 47.3 | 5.42 | 3.91 | 0.46 |
| KH11-12S           | 4010 | 56.00 | 7.08 | 16.19 | 0.353 | 11 | 955  | 185  | 85.2 | 9.61 | 1.63 | 0.22 |
| KH13 S             | 505  | 4.50  | 8.34 | 1.06  | 0.005 | 13 | 767  | 152  | 84.5 | 16.0 | 2.27 | 0.26 |
| KH14 S             | 515  | 4.00  | 7.07 | 2.92  | 0.141 | 14 | 617  | 38.9 | 88.6 | 7.13 | 2.38 | 0.14 |
| KH15, 23 S         | 1801 | 14.00 | 5.12 | 12.74 | 0.272 | 15 | 931  | 72.2 | 119  | 26.9 | 1.21 | 0.19 |
| KH16-17 S          | 715  | 4.00  | 7.5  | 4.55  | 0.180 | 16 | 807  | 63.0 | 124  | 14.6 | 2.49 | 0.35 |
| KH16-17 S          | 715  | 4.00  | 7.5  | 4.55  | 0.180 | 17 | 699  | 46.4 | 68.2 | 9.00 | 1.54 | 0.30 |
| KH11-12S           | 4010 | 56.00 | 7.08 | 16.19 | 0.353 | 12 | 859  | 70.9 | 105  | 7.32 | 4.10 | 0.28 |
| KH18 S             | 109  | 1.50  | 7.67 | 1.685 | 0.045 | 18 | 768  | 107  | 123  | 21.8 | 2.81 | 0.33 |
| KH19-20            | 105  | 1.50  | 8.46 | 0.88  | 0.005 | 19 | 745  | 96.2 | 86.1 | 14.5 | 2.67 | 0.39 |
| KH19-20            | 105  | 1.50  | 8.46 | 0.88  | 0.005 | 20 | 667  | 21.8 | 116  | 7.73 | 2.26 | 0.28 |
| KH3-5, 21 S        | 2740 | 31.50 | 7.91 | 5.36  | 0.124 | 21 | 1021 | 31.1 | 252  | 12.5 | 1.44 | 0.13 |
| KH10, 22 S         | 4814 | 61.00 | 7.02 | 18.52 | 0.673 | 22 | 996  | 59.7 | 215  | 35.6 | 1.68 | 0.55 |
| KH15, 23 S         | 1801 | 14.00 | 5.12 | 12.74 | 0.272 | 23 | 1044 | 62.0 | 178  | 12.1 | 2.79 | 0.26 |
| <b>Völkermarkt</b> |      |       |      |       |       |    |      |      |      |      |      |      |
| V1-5               | 63.5 | 0.58  | 6.8  | 0.58  | 0.002 | 1  | 1042 | 296  | 172  | 78.9 | 2.60 | 0.87 |
| V1-5               | 63.5 | 0.58  | 6.8  | 0.58  | 0.002 | 2  | 927  | 72.8 | 142  | 23.0 | 2.34 | 0.48 |
| V1-5               | 63.5 | 0.58  | 6.8  | 0.58  | 0.002 | 3  | 963  | 33.5 | 145  | 8.70 | 2.67 | 0.21 |
| V1-5               | 63.5 | 0.58  | 6.8  | 0.58  | 0.002 | 4  | 868  | 170  | 160  | 27.4 | 2.43 | 0.11 |
| V1-5               | 63.5 | 0.58  | 6.8  | 0.58  | 0.002 | 5  | 1116 | 261  | 190  | 28.6 | 1.14 | 0.47 |
| V6-11              | 74.4 | 0.46  | 6.7  | 0.72  | 0.010 | 7  | 925  | 158  | 154  | 34.8 | 2.56 | 0.64 |
| V6-11              | 74.4 | 0.46  | 6.7  | 0.72  | 0.010 | 9  | 664  | 84.6 | 103  | 20.7 | 3.05 | 0.41 |
| V6-11              | 74.4 | 0.46  | 6.7  | 0.72  | 0.010 | 10 | 939  | 76.1 | 147  | 16.8 | 2.63 | 0.26 |
| V6-11              | 74.4 | 0.46  | 6.7  | 0.72  | 0.010 | 11 | 888  | 64.7 | 159  | 6.21 | 0.82 | 0.14 |
| V12-21             | 58.4 | 0.45  | 6.5  | 1.40  | 0.001 | 12 | 794  | 22.7 | 117  | 9.19 | 2.55 | 0.31 |
| V12-22             | 58.4 | 0.45  | 6.5  | 1.40  | 0.001 | 13 | 897  | 107  | 178  | 36.9 | 2.40 | 0.59 |
| V12-23             | 58.4 | 0.45  | 6.5  | 1.40  | 0.001 | 14 | 766  | 37.9 | 110  | 9.39 | 3.21 | 0.26 |
| V12-24             | 58.4 | 0.45  | 6.5  | 1.40  | 0.001 | 15 | 972  | 189  | 151  | 30.8 | 3.08 | 0.72 |
| V12-25             | 58.4 | 0.45  | 6.5  | 1.40  | 0.001 | 16 | 606  | 32.3 | 82.0 | 1.33 | 4.62 | 0.10 |
| V12-26             | 58.4 | 0.45  | 6.5  | 1.40  | 0.001 | 17 | 942  | 225  | 160  | 58.2 | 3.19 | 0.73 |
| V12-27             | 58.4 | 0.45  | 6.5  | 1.40  | 0.001 | 18 | 914  | 62.9 | 196  | 20.6 | 1.14 | 0.28 |
| V12-28             | 58.4 | 0.45  | 6.5  | 1.40  | 0.001 | 19 | 1064 | 192  | 160  | 28.8 | 1.87 | 0.75 |
| V12-29             | 58.4 | 0.45  | 6.5  | 1.40  | 0.001 | 20 | 759  | 59.0 | 106  | 16.0 | 3.95 | 0.41 |
| V12-30             | 58.4 | 0.45  | 6.5  | 1.40  | 0.001 | 21 | 1009 | 150  | 109  | 12.7 | 2.23 | 0.75 |

\*) these two Zn soil concentrations are probably high because of a nearby rusty and leaching fence.

**Supplementary Table 2** Overview of the SSR marker characteristics

| Locus     | Allele Size [bp] | Primer Sequence 5' - 3'                                    | Motif in <i>S. caprea</i>             | Motif in <i>P. trichocarpa</i>           | Chromosomal Position |
|-----------|------------------|------------------------------------------------------------|---------------------------------------|------------------------------------------|----------------------|
| ORPM_62   | 170-198          | F: CGGAGTCAGCTTGAGGTAGC<br>R: CGGCAATATTGAGGAGAATGA        | [AT] <sub>2</sub> .. [T] <sub>8</sub> | [AT] <sub>4</sub> ..[ATTTT] <sub>3</sub> | I<br>16.99 Mb        |
| ORPM_312  | 177-207          | F: GTGGGGATCAATCCAAAAGA<br>R: CCCATATCAAACCATTTGAAAAA      | [CTT] <sub>5</sub>                    | [CCT] <sub>6</sub>                       | VII<br>9.31 Mb       |
| ORPM_446  | 220-258          | F: GGGCTGCAGACAAATTAAGG<br>R: TGGGACATGCTCCATGGTAT         | [CT] <sub>3</sub> ..[CT] <sub>4</sub> | [CT] <sub>3</sub> ..[CT] <sub>4</sub>    | XIV – 3.69 Mb        |
|           |                  |                                                            |                                       | Motif in <i>P. nigra</i>                 |                      |
| WMPS_12   | 146-155          | F: TTTTTCGTATTCTTATCTATCC<br>R: CACTACTCTGACAAAACCATC      | [CA] <sub>4</sub>                     | [CA] <sub>4</sub>                        | VI<br>11.36 Mb       |
| WMPS_14   | 205-237          | F: CAGCCGCAGCCACTGAGAAATC<br>R: GCCTGCTGAGAAGACTGCCTTGAC   | <sup>1</sup> [CAG] <sub>21</sub>      | <sup>1</sup> [CAG] <sub>28</sub>         | V<br>12.53 Mb        |
| WMPS_19   | 152-209          | F: AGCCACAGCAAATTCAGATGATGC<br>R: CCTGCTGAGAAGACTGCCTTGACA | <sup>2</sup> [CAG] <sub>22</sub>      | <sup>2</sup> [CAG] <sub>38</sub>         | V<br>12.53 Mb        |
| WMPS_21   | 157-184          | F: TGCTGATGCAAAAGATTTAG<br>R: TTGGAACTTCAACATTCAGAT        | [GCT] <sub>27</sub>                   | [GCT] <sub>45</sub>                      | II<br>5.05 Mb        |
|           |                  |                                                            |                                       | Motif in <i>S. burjatica</i>             |                      |
| SB_24     | 127-153          | F: ACTTCAATCTCTCTGTATTCT<br>R: CTATTTATGGGTTGGTCGATC       | <sup>3</sup> [TG] <sub>9</sub>        | <sup>3</sup> [TG] <sub>9</sub>           | XI<br>4.70 Mb        |
| SB_38     | 91-151           | F: CCACTTGAGGAGTGTAAGGAT<br>R: CTAAATGTA AAAACTGAATCT      | [TG] <sub>27</sub>                    | [TG] <sub>27</sub>                       | IX<br>10.38 Mb       |
| SB_199    | 95-127           | F: CTATTTGGTCTCAATCACCTT<br>R: CTTACCTCAGAAAATCCAGA        | [TG] <sub>15</sub>                    | [TG] <sub>11</sub> CG[TG] <sub>6</sub>   | XV<br>9.74 Mb        |
|           |                  |                                                            |                                       | Motif in <i>S. lanata</i>                |                      |
| gSIMCT024 | 96-124           | F: CTCCTTCACTTGCTCCAT<br>R: TAATACCAGCCCTTAAAGAAG          | [CT] <sub>14</sub>                    | [CT] <sub>10</sub>                       | X<br>14.27 Mb        |

<sup>1</sup>Complete complex motif in *S. caprea*: [CAG]<sub>4</sub>CAT[CAG]<sub>12</sub>CAT[CAG]<sub>3</sub> and in *P. nigra*: [CAG]<sub>1</sub>CAT[CAG]<sub>12</sub>CAT[CAG]<sub>9</sub>CAT[CAG]<sub>3</sub>

<sup>2</sup>Complete complex motif in *S. caprea*: [CAG]<sub>2</sub>CAT[CAG]<sub>8</sub>CAT[CAG]<sub>10</sub> and in *P. nigra*: [CAG]<sub>3</sub>CAT[CAG]<sub>8</sub>CAT[CAG]<sub>8</sub>CAT[CAG]<sub>4</sub>CAA[CAG]<sub>3</sub>

<sup>3</sup>Complete complex motif in *S. caprea*: [TG]<sub>9</sub>A[TG]<sub>2</sub>A[TG]<sub>4</sub> and in *S. burjatica*: [TG]<sub>9</sub>A[TG]<sub>2</sub>A[TG]<sub>4</sub>..[TG]<sub>3</sub>

**Supplementary Table 3** Heterozygosities, lnRH and normalized lnRH values of the 11 loci and seven populations. Loci with Norm.Θ values of larger +1.95 and smaller -1.95 have a significant reduced variability and thus might have been under selection and contribute to adaptation in the contamination area.

| Locus     | $H_{obs}$ | $H_{exp}$ | Populations |      |      |      |      |      |      | $\mu_c$ | $\mu_u$ | lnRH<br>Θ | Norm.Θ |
|-----------|-----------|-----------|-------------|------|------|------|------|------|------|---------|---------|-----------|--------|
|           |           |           | A           | M    | V    | F    | KH   | PR   | P    |         |         |           |        |
| ORPM_62   | 0.49      | 0.74      | 0.79        | 0.55 | 0.67 | 0.70 | 0.75 | 0.78 | 0.71 | 0,72    | 0,69    | 0,18      | -0,30  |
| ORPM_312  | 0.81      | 0.82      | 0.85        | 0.82 | 0.84 | 0.73 | 0.88 | 0.77 | 0.74 | 0,83    | 0,77    | 0,63      | 0,79   |
| ORPM_446  | 0.56      | 0.81      | 0.86        | 0.80 | 0.79 | 0.75 | 0.80 | 0.79 | 0.80 | 0,81    | 0,78    | 0,33      | 0,07   |
| WMPS_12   | 0.34      | 0.33      | 0.25        | 0.44 | 0.09 | 0.38 | 0.41 | 0.50 | 0.20 | 0,40    | 0,22    | 0,99      | 1,68   |
| WMPS_14   | 0.85      | 0.84      | 0.81        | 0.86 | 0.84 | 0.85 | 0.77 | 0.86 | 0.90 | 0,83    | 0,86    | -0,51     | -1,97* |
| WMPS_19   | 0.84      | 0.88      | 0.86        | 0.88 | 0.85 | 0.86 | 0.88 | 0.89 | 0.89 | 0,88    | 0,87    | 0,17      | -0,32  |
| WMPS_21   | 0.79      | 0.76      | 0.75        | 0.75 | 0.75 | 0.71 | 0.75 | 0.76 | 0.82 | 0,75    | 0,76    | -0,07     | -0,90  |
| SB_24     | 0.89      | 0.77      | 0.77        | 0.82 | 0.79 | 0.79 | 0.79 | 0.78 | 0.67 | 0,79    | 0,75    | 0,37      | 0,16   |
| SB_38     | 0.82      | 0.91      | 0.90        | 0.93 | 0.82 | 0.90 | 0.92 | 0.89 | 0.89 | 0,91    | 0,87    | 0,74      | 1,07   |
| SB_199    | 0.61      | 0.76      | 0.80        | 0.79 | 0.79 | 0.81 | 0.78 | 0.65 | 0.65 | 0,76    | 0,75    | 0,04      | -0,63  |
| gSIMCT024 | 0.85      | 0.80      | 0.82        | 0.74 | 0.73 | 0.84 | 0.84 | 0.83 | 0.76 | 0,82    | 0,78    | 0,45      | 0,35   |
| all loci  | 0.71      | 0.77      | 0.77        | 0.76 | 0.72 | 0.76 | 0.78 | 0.77 | 0.73 |         |         |           |        |

\* only significant without Bonferroni correction

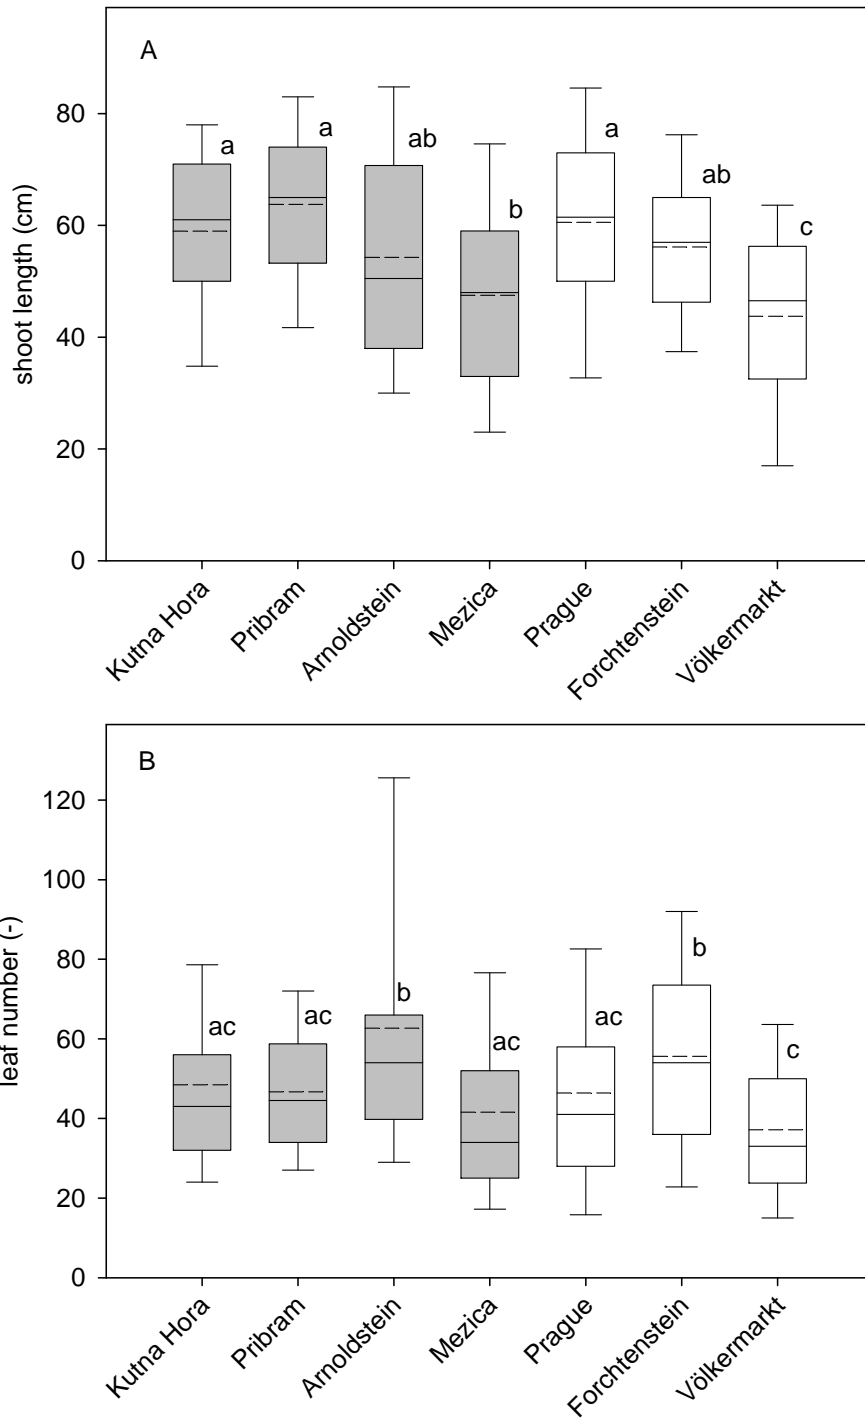

**Supplementary Figure 1:** Shoot length (A) and leaf number (B) of *S. caprea* isolates. Boxes represent the median (vertical solid line), the arithmetic mean (vertical dashed line), and 25 – 75 % percentile. Whiskers represent the 90<sup>th</sup> and 10<sup>th</sup> percentile. Significant differences were determined by a post hoc comparison of means (Scheffé test after nested analysis of variance;  $p < 0.05$ ) and are indicated by different letters.

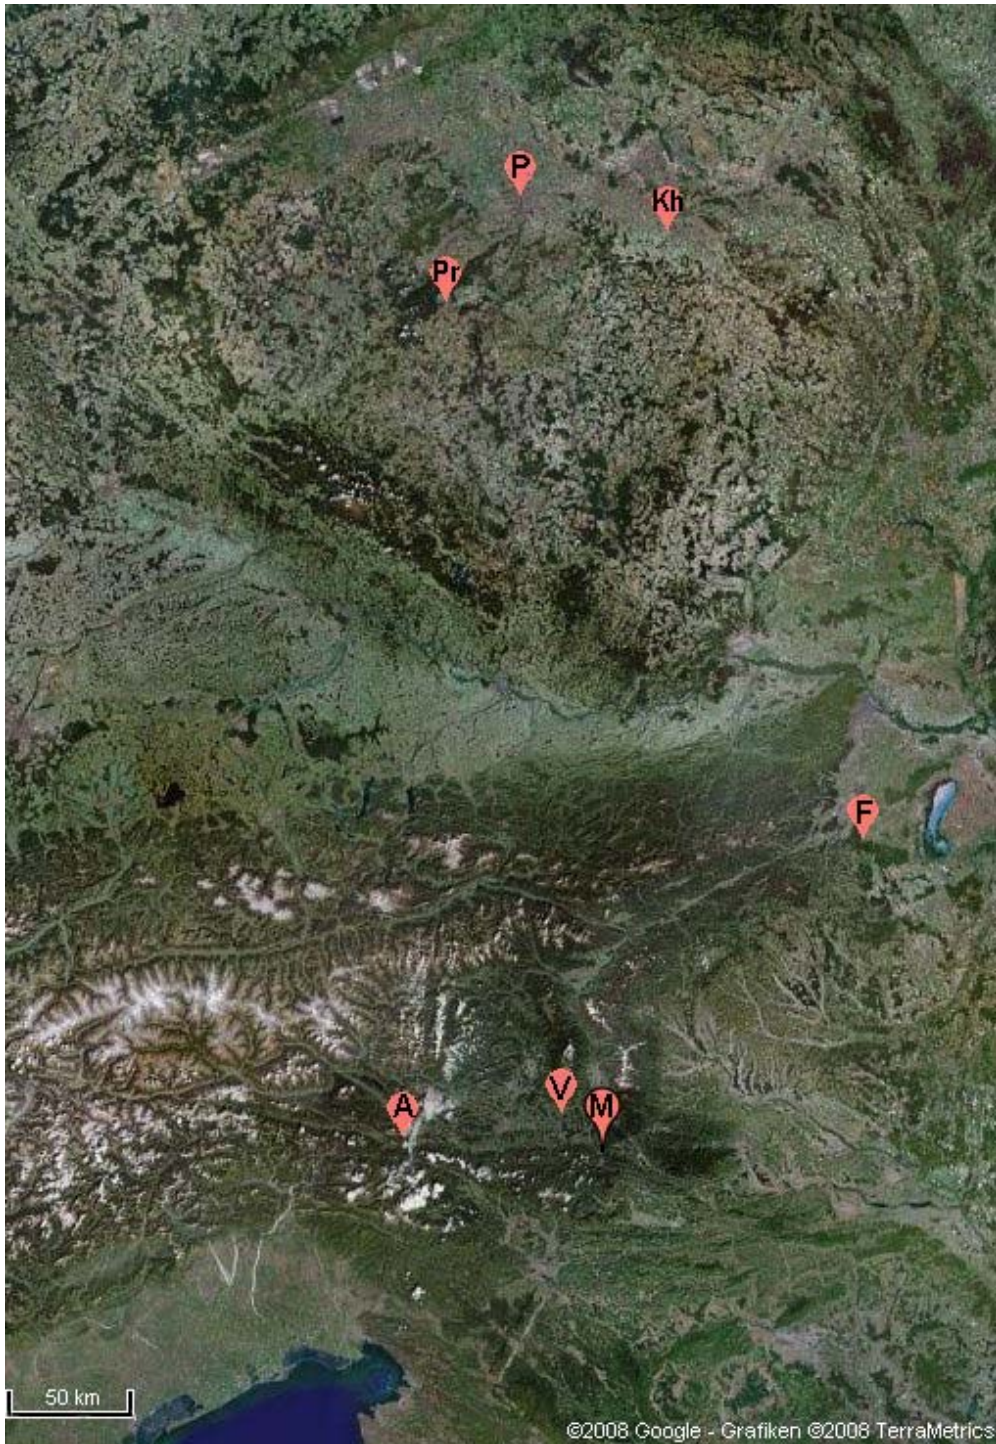

**Supplementary Figure 2:** Geographic map indicating the location of the *S. caprea* populations. South the Alps in Slovenia the contaminated population in Mežica – M, and in Austria the contaminated population Arnoldstein – (A) and the non-contaminated sites, Völkermarkt - V and Forchtenstein – F. North the Alps in the Czech Republic the two contaminated populations Příbram – PR and Kutná Hora – KH and the non-contaminated site near Prague (P).

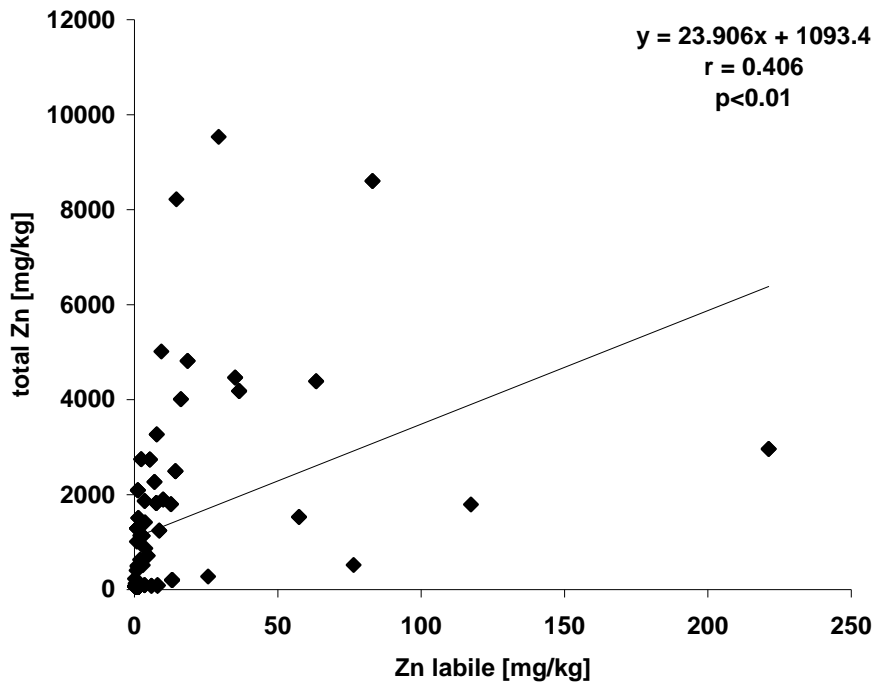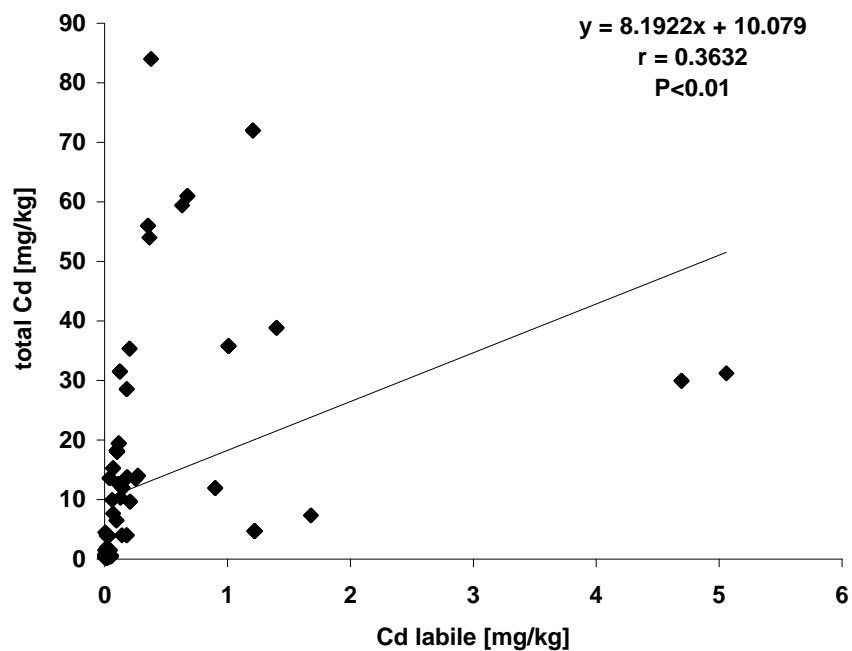

**Supplementary Figure 3:** The graphs show that the amount of labile Zn and Cd depends with a significance level for Pearson's correlation of  $p < 0.01$  on the total Zn and Cd concentration in the soil. In fact 40% of the variation of labile Zn and 36% for Cd are explained by the total Zn and Cd concentration, respectively. Other factors influencing the labile heavy metal fractions are pH, content of clay, carbonate and organic matter.



**A**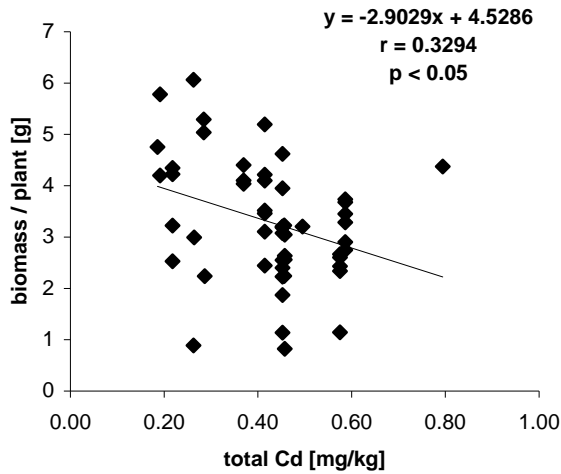**B**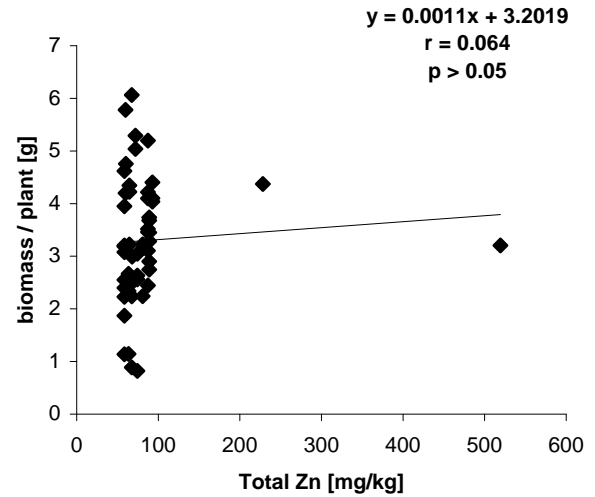**C**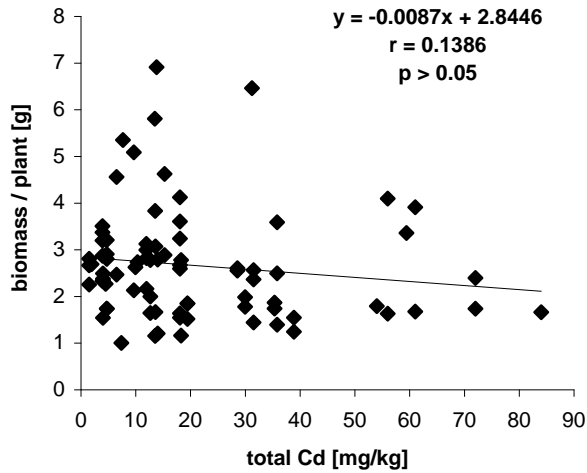**D**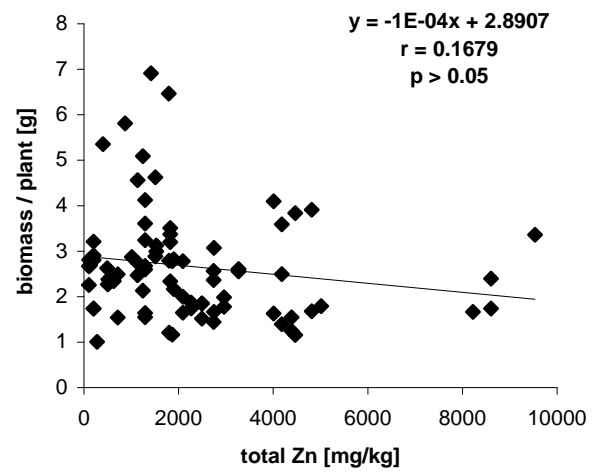

**Supplementary Figure 4:** Pearson's correlations between the level of contamination where the isolate originated and the biomass production in perlite cultures exposed to elevated levels of Cd and Zn. A and B are the graphs for the uncontaminated, C and D for the contaminated sites. The only significant negative correlation between Cd concentration and biomass production was seen at uncontaminated sites (A). Isolates from the contaminated sites did not show such a correlation indicating that they might have been selected to withstand higher Cd and Zn concentrations.

Note that two soil samples from the uncontaminated sites had very high Zn concentrations probably because of a nearby rusty fence that leached into the soil (B).

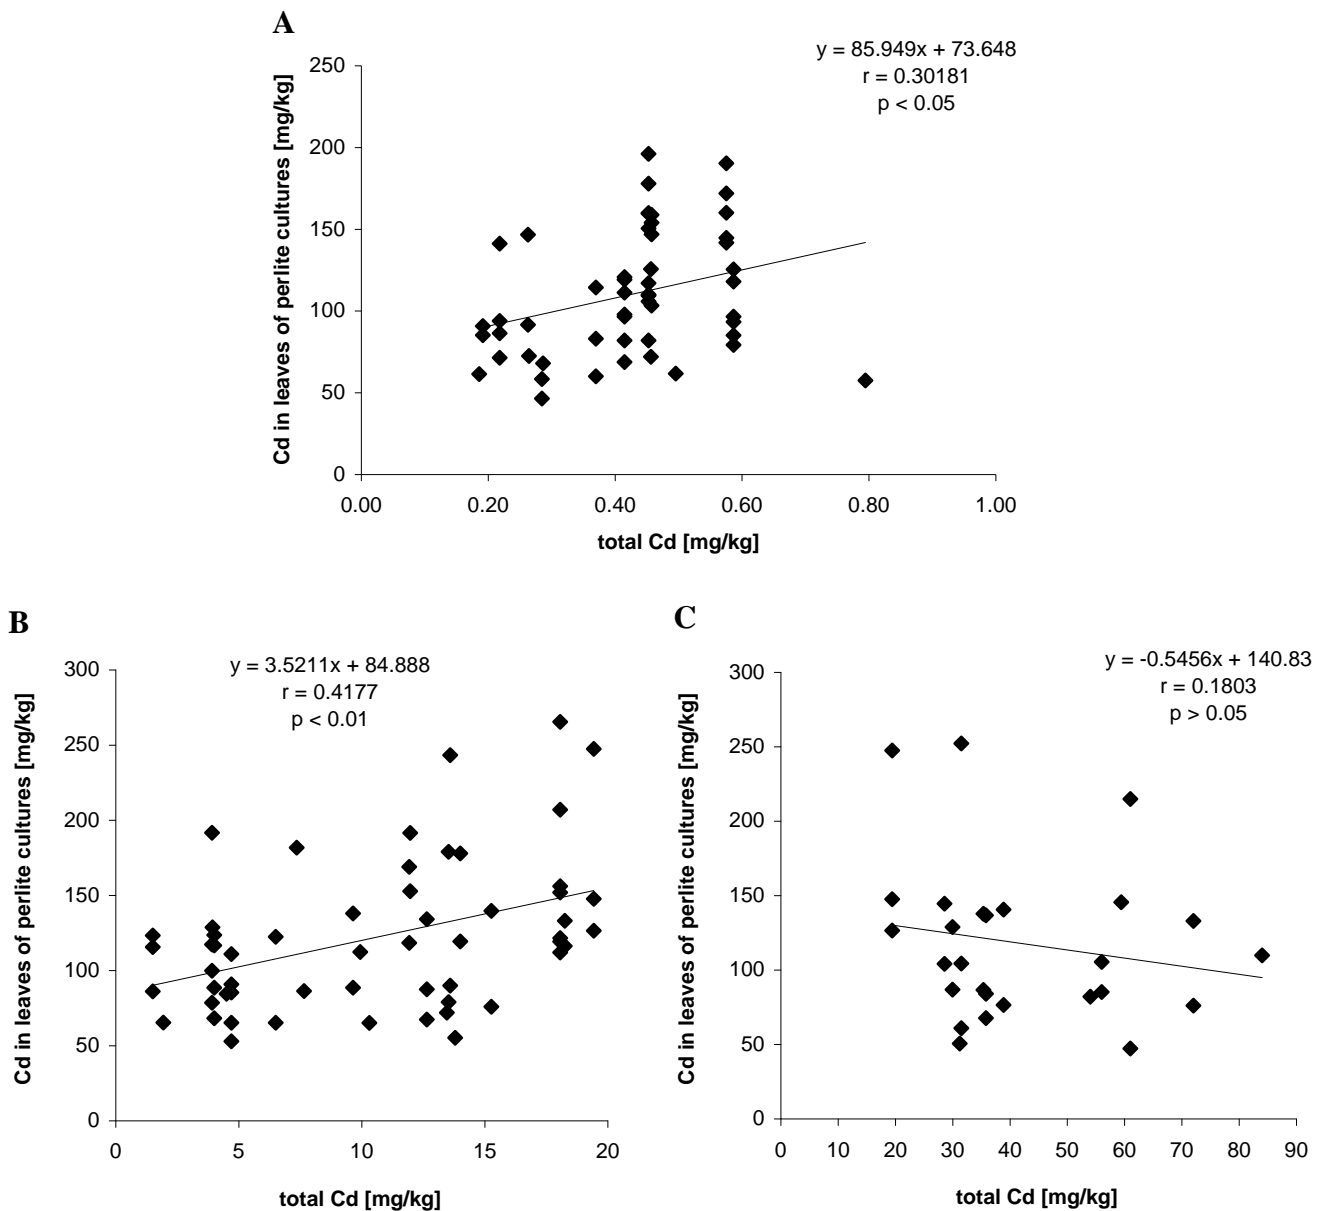

**Supplementary Figure 5:** Pearson’s correlations between the level of soil contamination and Cd concentration in leaves after the exposure of the isolates in perlite to Cd and Zn. While a significant trend was found between soil contamination and accumulation capacity in perlite cultures for soil contamination below 20 mg kg<sup>-1</sup> (A, B) above this soil Cd contamination level the trend diminished.
